# Supplementary material for: The Evolution of Multivariate Maternal Effects
Source: PLOS journal article supplement (doi:10.1371/journal.pcbi.1003550), 2014-04-10
Supplement: S5 (10.1371/journal.pcbi.1003550.s005) [file journal.pcbi.1003550.s005]

**Figure S5** The evolution of multivariate maternal effects in a stochastically fluctuating environment, where the selective optimum  $\theta_i(t-1)$  in the parental generation is correlated with  $\theta_j(t)$  in the offspring generation. Panel A: the cross-correlation between optimum  $\theta_2(t-1)$  and  $\theta_1(t)$  is varied from  $-1$  to  $1$ , while the other cross-correlation  $\text{cor}(\theta_1(t-1), \theta_2(t))$  is constrained between values  $0$  and  $-0.1$ . As a consequence, the cross-trait maternal effect  $m_{12}$  from maternal trait  $z_2^*(t-1)$  to offspring trait  $z_1(t)$  evolves from negative to positive values, in line with the dominant cross-correlation. Panel B: now, the cross-correlation between optimum  $\theta_1(t-1)$  and  $\theta_2(t)$  is varied from  $-1$  to  $1$ , while the other cross-correlation is constrained to much smaller values. Again, we find that the corresponding cross-trait maternal effect  $m_{21}$  from maternal trait  $z_1^*(t-1)$  to offspring trait  $z_2(t)$  evolves from negative to positive, in line with the cross-correlation. In both panels, the within-trait autocorrelations  $\text{cor}(\theta_1(t-1), \theta_1(t)) = \text{cor}(\theta_2(t-1), \theta_2(t)) = \rho$  are set at  $\rho = 0.1$ . Parameters:  $\mu = 0.01$ ,  $\phi = 0$ ,  $c = 0.1$ ,  $\sigma_\varepsilon = 0.32$ .

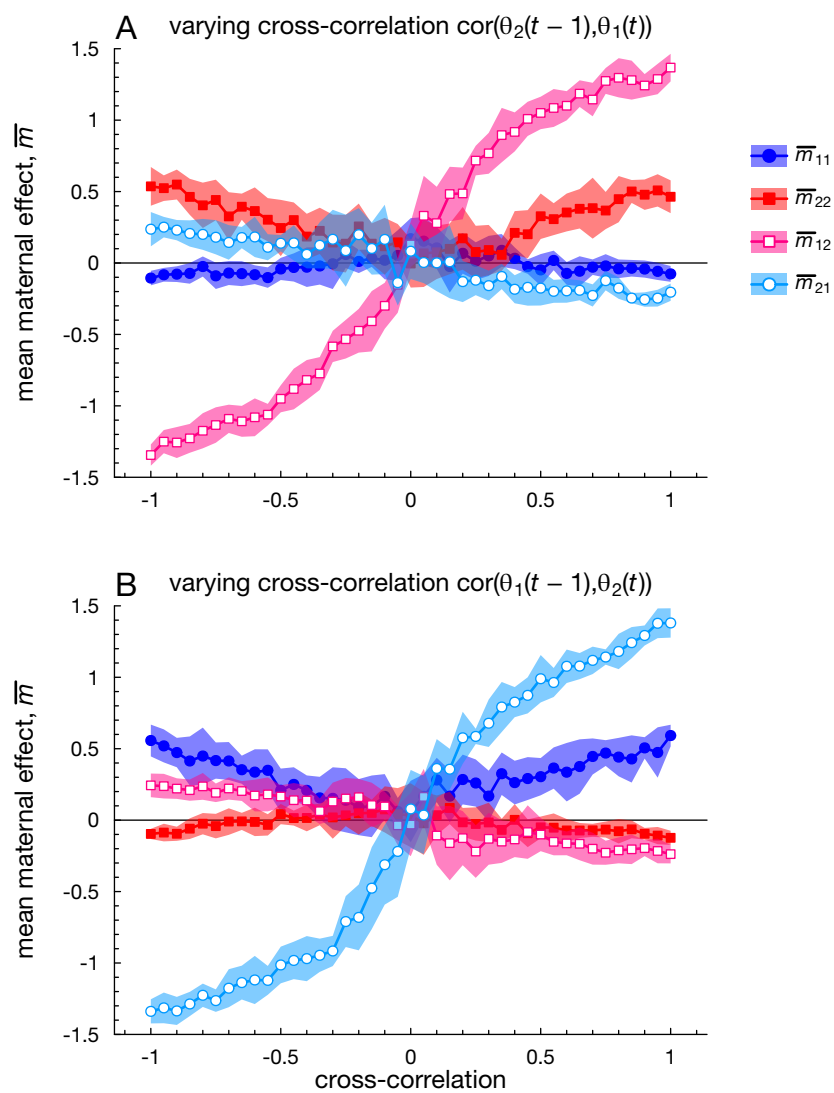

Figure S5:
